# Supplementary material
Source: Springer Nature journal article supplement (https://www.springermedizin.de/resource/supplementary/12889_2009_2308_MOESM1_ESM.pdf/9485336)
Supplement: MOESM1 [file 9485336]

**5344 telephone numbers were selected**

**1524 valid household contacts**

1000 eligible responses

117 eligible respondents identified with the last birthday method were unable to be contacted

389 eligible respondents refused to join the study

18 eligible respondents did not complete the interview

**3820 invalid household contacts**

1146 hanged up the phone immediately

148 respondents were under 18 years of age or were unable to answer for eligibility of household member

42 were non household numbers

90 did not understand Chinese

1391 had no answers in all three attempts

1003 were invalid phone numbers (fax numbers or numbers protected by password)
